# Supplementary material
Source: MDPI journal article supplement (https://www.mdpi.com/2076-3417/12/3/1650)
Supplement: s1 [file s1]

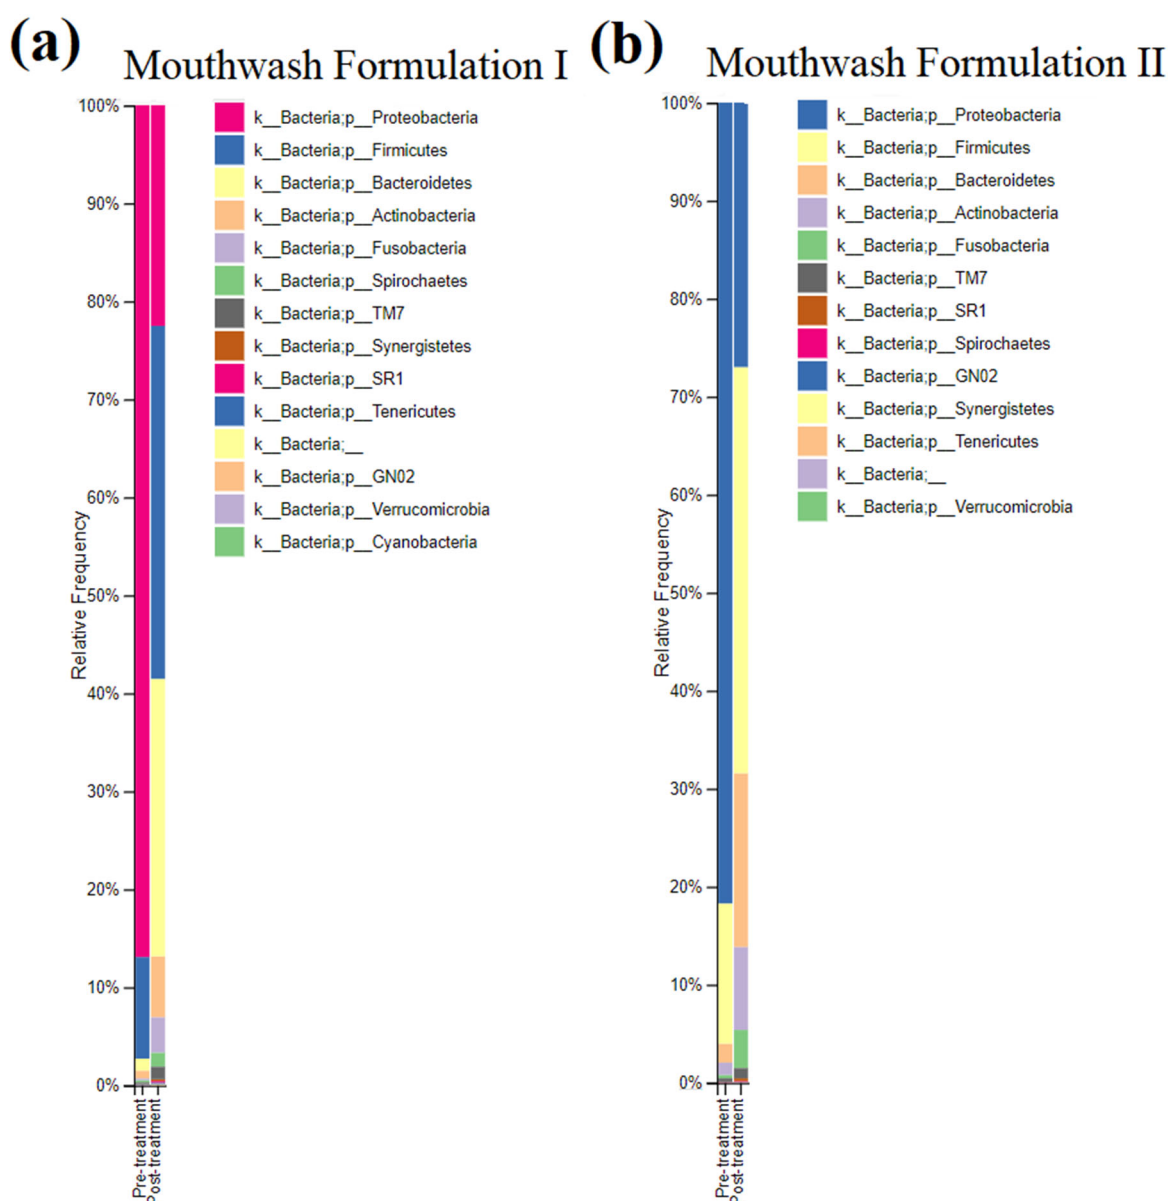

**Figure S1:** Taxonomy and relative frequency of the pre-and post-treatment samples of G1 (a; Mouthwash formulation I) and G2 (b; Mouthwash formulation II).

### Mouthwash Formulation I

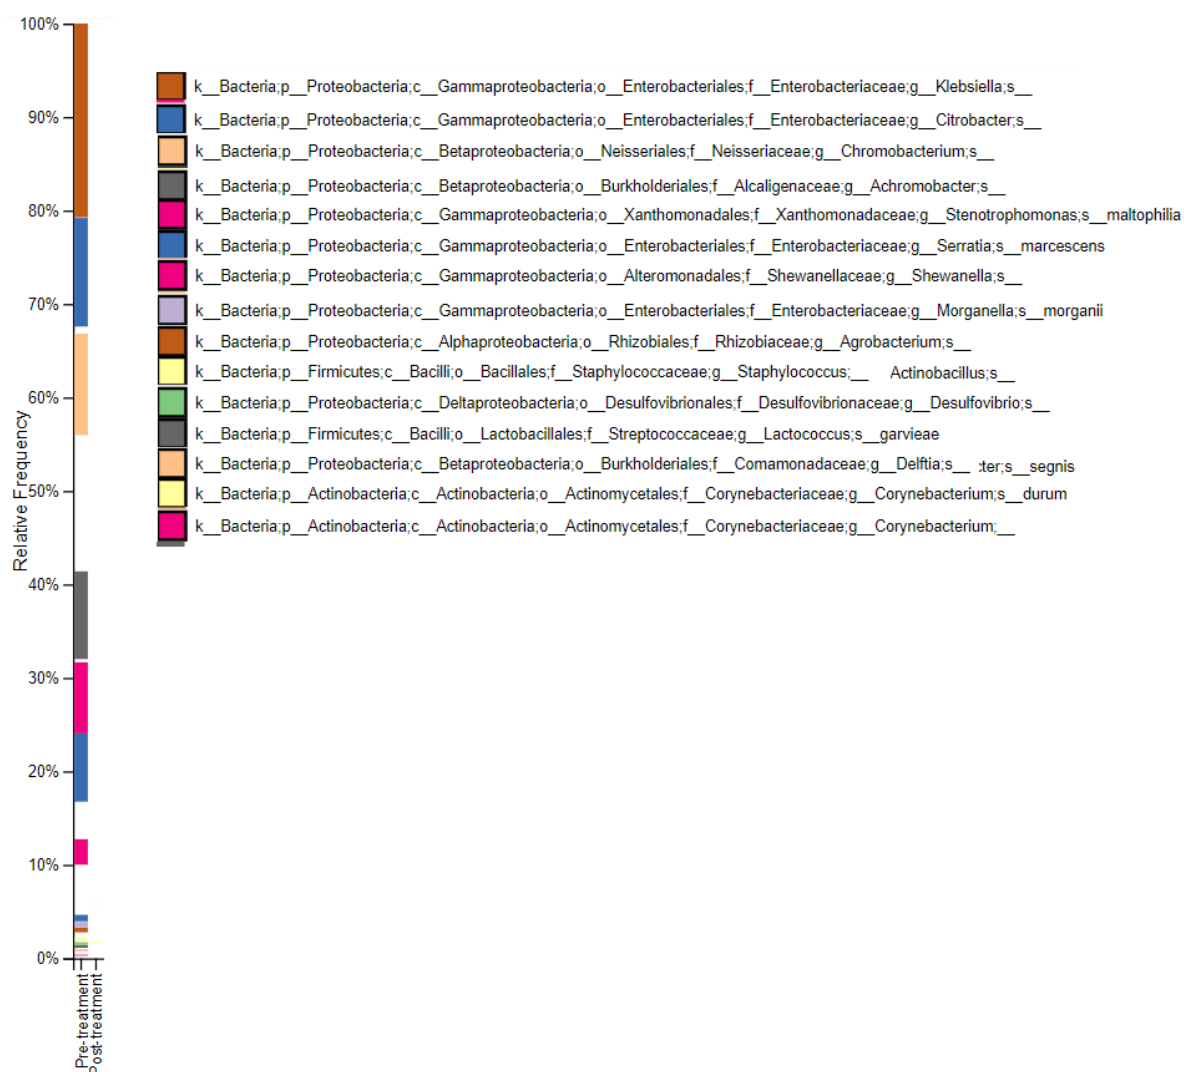

**Figure S2:** The comparison of genus level changes in pre-and post-treatment samples of G1 (Mouthwash formulation I).

**Figure S3:**

## Mouthwash Formulation II

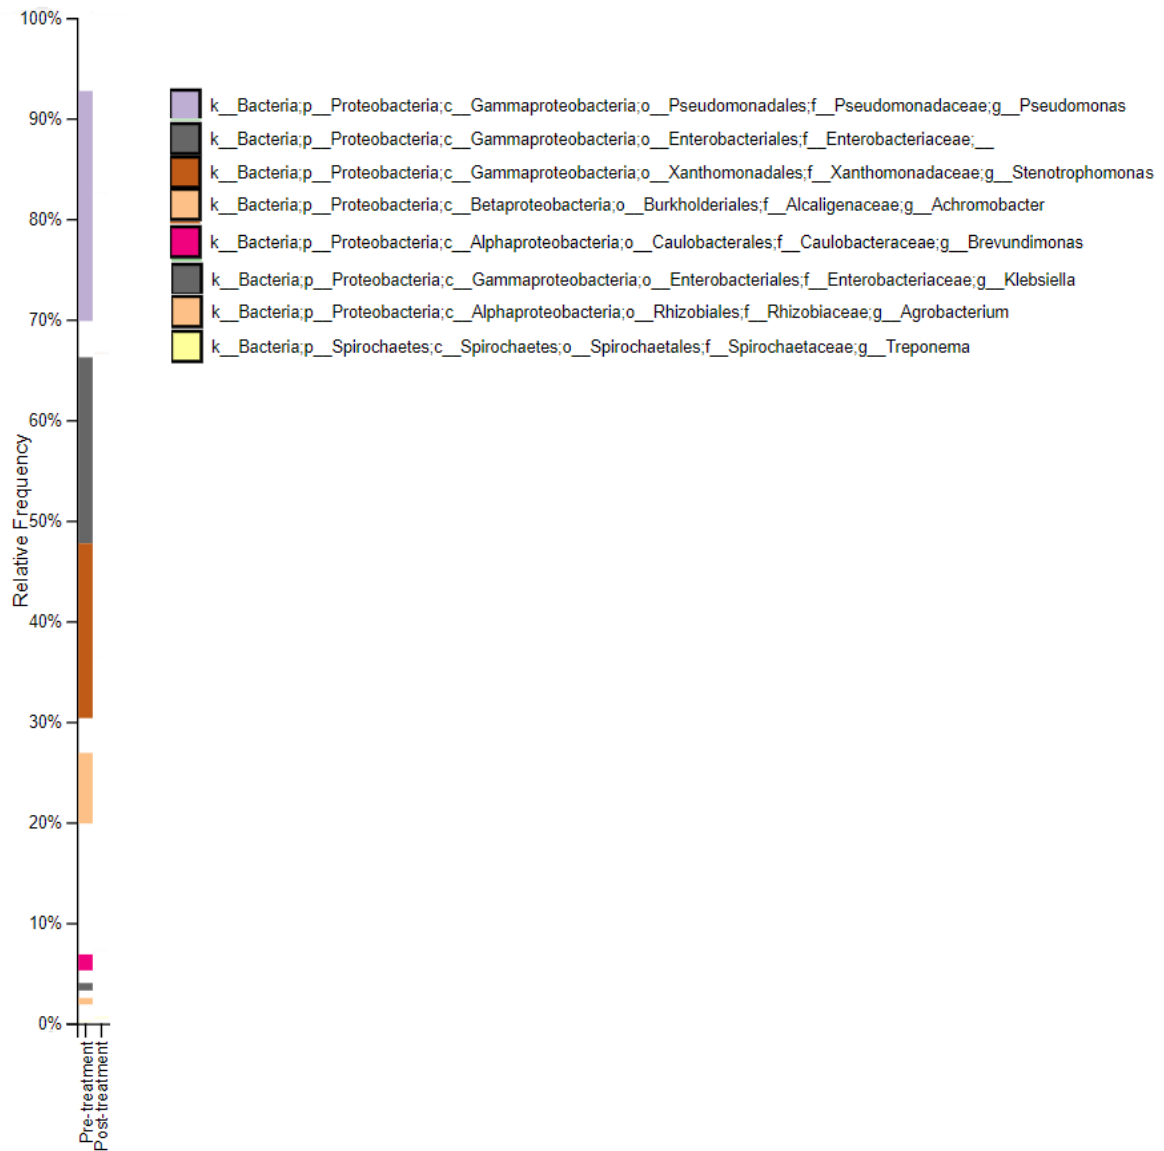

**Figure S3:** The comparison of genus level changes in pre-and post-treatment samples of G2 (Mouthwash formulation II).
